# Supplementary material for: The effect of rare alleles on estimated genomic relationships from whole genome sequence data
Source: PubMed Central journal article supplement (PMC4365517; doi:10.1186/s12863-015-0185-0), 2015-03-12
Supplement: 12863_2015_185_MOESM1_ESM.pdf [file 12863_2015_185_MOESM1_ESM.pdf]

## Additional file 1 - G matrix computation based on similarities

Similarity (S) can be measured as the number of shared alleles between individuals  $j$  and  $k$  for each genotype at locus  $i$ , such as [1]

$$S_{jk,i} = \frac{I_{j1k1} + I_{j1k2} + I_{j2k1} + I_{j2k2}}{4}$$

For a single locus,  $S_{jk} =$

| <b>ind<sub>j</sub>/ind<sub>k</sub></b> | <b>AA</b> | <b>AB</b> | <b>BB</b> |
|----------------------------------------|-----------|-----------|-----------|
| <b>AA</b>                              | 1         | 0.5       | 0         |
| <b>AB</b>                              | 0.5       | 0.5       | 0.5       |
| <b>BB</b>                              | 0         | 0.5       | 1         |

We shall now show that this is similar to computing relationships using the following equations as outlined by Yang et al [2], with allele frequency  $p_i$  fixed at 0.5 for all variants.

$$G_{jk} = \frac{1}{N} \sum_i G_{ijk} = \begin{cases} \frac{1}{N} \sum_i \frac{(x_{ij} - 2p_i)(x_{ik} - 2p_i)}{2p_i(1 - p_i)}, & j \neq k \\ 1 + \frac{1}{N} \sum_i \frac{x_{ij}^2 - (1 + 2p_i)x_{ij} + 2p_i^2}{2p_i(1 - p_i)}, & j = k \end{cases} \quad (1)$$

$$(1) \quad \frac{(x_{ij} - 2p_i)(x_{ik} - 2p_i)}{2p_i(1 - p_i)} = \frac{(x_{ij} - 1)(x_{ik} - 1)}{0.5}$$

$$(2) \quad 1 + \frac{x_{ij}^2 - (1 + 2p_i)x_{ij} + 2p_i^2}{2p_i(1 - p_i)} = 1 + \frac{x_{ij}^2 - 2x_{ij} + 0.5}{0.5}$$

$$= \frac{x_{ij}^2 - 2x_{ij} + 1}{0.5} = \frac{(x_{ij} - 1)(x_{ij} - 1)}{0.5}$$

If  $x_{ij} = x_{ik}$  then (1) = (2) and only one equation is needed to calculate both diagonal and off-diagonal elements.

In this case,  $G_{jk} =$

| <b>ind<sub>j</sub>/ ind<sub>k</sub></b> | <b>AA [2]</b> | <b>AB [1]</b> | <b>BB [0]</b> |
|-----------------------------------------|---------------|---------------|---------------|
| <b>AA [2]</b>                           | 2             | 0             | -2            |
| <b>AB [1]</b>                           | 0             | 0             | 0             |
| <b>BB [0]</b>                           | -2            | 0             | 2             |

$S$  and  $G$  are linked by the following transformation:  $4 * (S_{jk} - \bar{S}_{jk}) = G_{jk}$ , with  $\bar{S}_{jk} = 0.5$ .

In the case of multiple loci,

$$G_{jk} = \frac{1}{N} \sum_i G_{ijk} = \frac{1}{N} \sum_i \frac{(x_{ij} - 1)(x_{ik} - 1)}{0.5}$$

Which is equivalent, in matrix notation, to  $\mathbf{G} = \frac{(\mathbf{M}-1)(\mathbf{M}-1)'}{(N/2)}$ , where  $\mathbf{M}$  is the genotype matrix containing values of 0, 1 and 2.

1. Eding H, Crooijmans R, Groenen MAM, Meuwissen THE: **Assessing the contribution of breeds to genetic diversity in conservation schemes.** *Genet Sel Evol* 2002, **34**(5):613-633.
2. Yang JA, Benyamin B, McEvoy BP, Gordon S, Henders AK, Nyholt DR, Madden PA, Heath AC, Martin NG, Montgomery GW, Goddard ME, Visscher PM: **Common SNPs explain a large proportion of the heritability for human height.** *Nat Genet* 2010, **42**(7):565-569.
